# Supplementary material for: CoCAS: a ChIP-on-chip analysis suite
Source: PubMed Central journal article supplement — Bioinformatics. 2009 Feb 4;25(7):954–5. doi: 10.1093/bioinformatics/btp075 (PMC2660873; doi:10.1093/bioinformatics/btp075), 2009-02-04
Supplement: btp075_1.pdf [file btp075_1.pdf]

## Suz12 ChIP-on-chip

**Supplementary Data S1:** Murine embryonic stem cells (mESC, clone CK35) were grown on a layer of mouse embryonic fibroblasts (MEF) in the presence of leukemia inhibitory factor (LIF) on gelatinised plates. mESC were crosslinked as previously described (Boyer *et al.*, 2006) after separation from MEF in the presence of a final concentration of 1% formaldehyde for 10 minutes.  $5 \times 10^7$  cells were lysed as previously described (Boyer *et al.*, 2006) and the chromatin was sonicated to an average size of 400bp using 10 cycles of 30 second bursts and 30 second resting on ice using a VibraCell (VibraCell, Danbury, USA) sonicator. For the replicate ChIP's, 50 $\mu$ l of ProtG-coated Dynalbeads (Invitrogen, USA) were incubated at 4°C overnight with 5 $\mu$ g of anti-Suz12 antibody (Abcam, ab12073) as previously described (Boyer *et al.*, 2006). Extracts corresponding to  $2.5 \times 10^7$  cells were added and incubated overnight at 4°C. Beads were washed 5 times using RIPA buffer (50mM HEPES pH 7.6, 500mM LiCl, 10mM EDTA pH 8, 1% NP-40, 0.7% Na-Deoxycholate) and 1 time TE-NaCl (10mM Tris pH8, 1mM EDTA pH 8, 50mM NaCl). Two subsequent elutions at 65°C were performed for 15 minutes using elution buffer (50mM Tris pH 8, 10mM EDTA pH 8, 1% SDS) and crosslinks were reversed by overnight incubation at 65°C together with an input fraction. Samples were RNase and proteinase K digested and purified using two subsequent phenol:chloroform:isoamylalcohol extractions and a Qiaquick PCR purification column (Qiagen, Germany). DNA was eluted in water and known targets were validated by qPCR (Boyer *et al.*, 2006). ChIP and input were amplified using a two-round T7 amplification protocol (van Bakel *et al.*, 2008). The size of the RNA was validated on a bioanalyzer (Agilent, USA), indirectly labelled, 4.5 $\mu$ g of input and ChIP material hybridised to an Agilent mouse promoter array set and washed as previously described (van Bakel *et al.*, 2008). The slides were washed and scanned in an ozone-free environment using an Agilent scanner and extracted using the Agilent Feature Extraction software.

This specific set of data is available at <http://www.ciml.univ-mrs.fr/software/ferrier.htm>.

### References:

- Boyer, L.A. et al. (2006) Polycomb complexes repress developmental regulators in murine embryonic stem cells. *Nature*, 441, 349-353.  
van Bakel, H., et al. (2008) Improved genome-wide localization by ChIP-chip using double-round T7 RNA polymerase-based amplification. *Nucleic Acids Res.*, 36, e21.
