# Supplementary material for: CoCAS: a ChIP-on-chip analysis suite
Source: PubMed Central journal article supplement — Bioinformatics. 2009 Feb 4;25(7):954–5. doi: 10.1093/bioinformatics/btp075 (PMC2660873; doi:10.1093/bioinformatics/btp075), 2009-02-04
Supplement: btp075_3.pdf [file btp075_3.pdf]

# Effects of different intra-normalisation methods (applied on Suz12 ChIP-on-chip data)

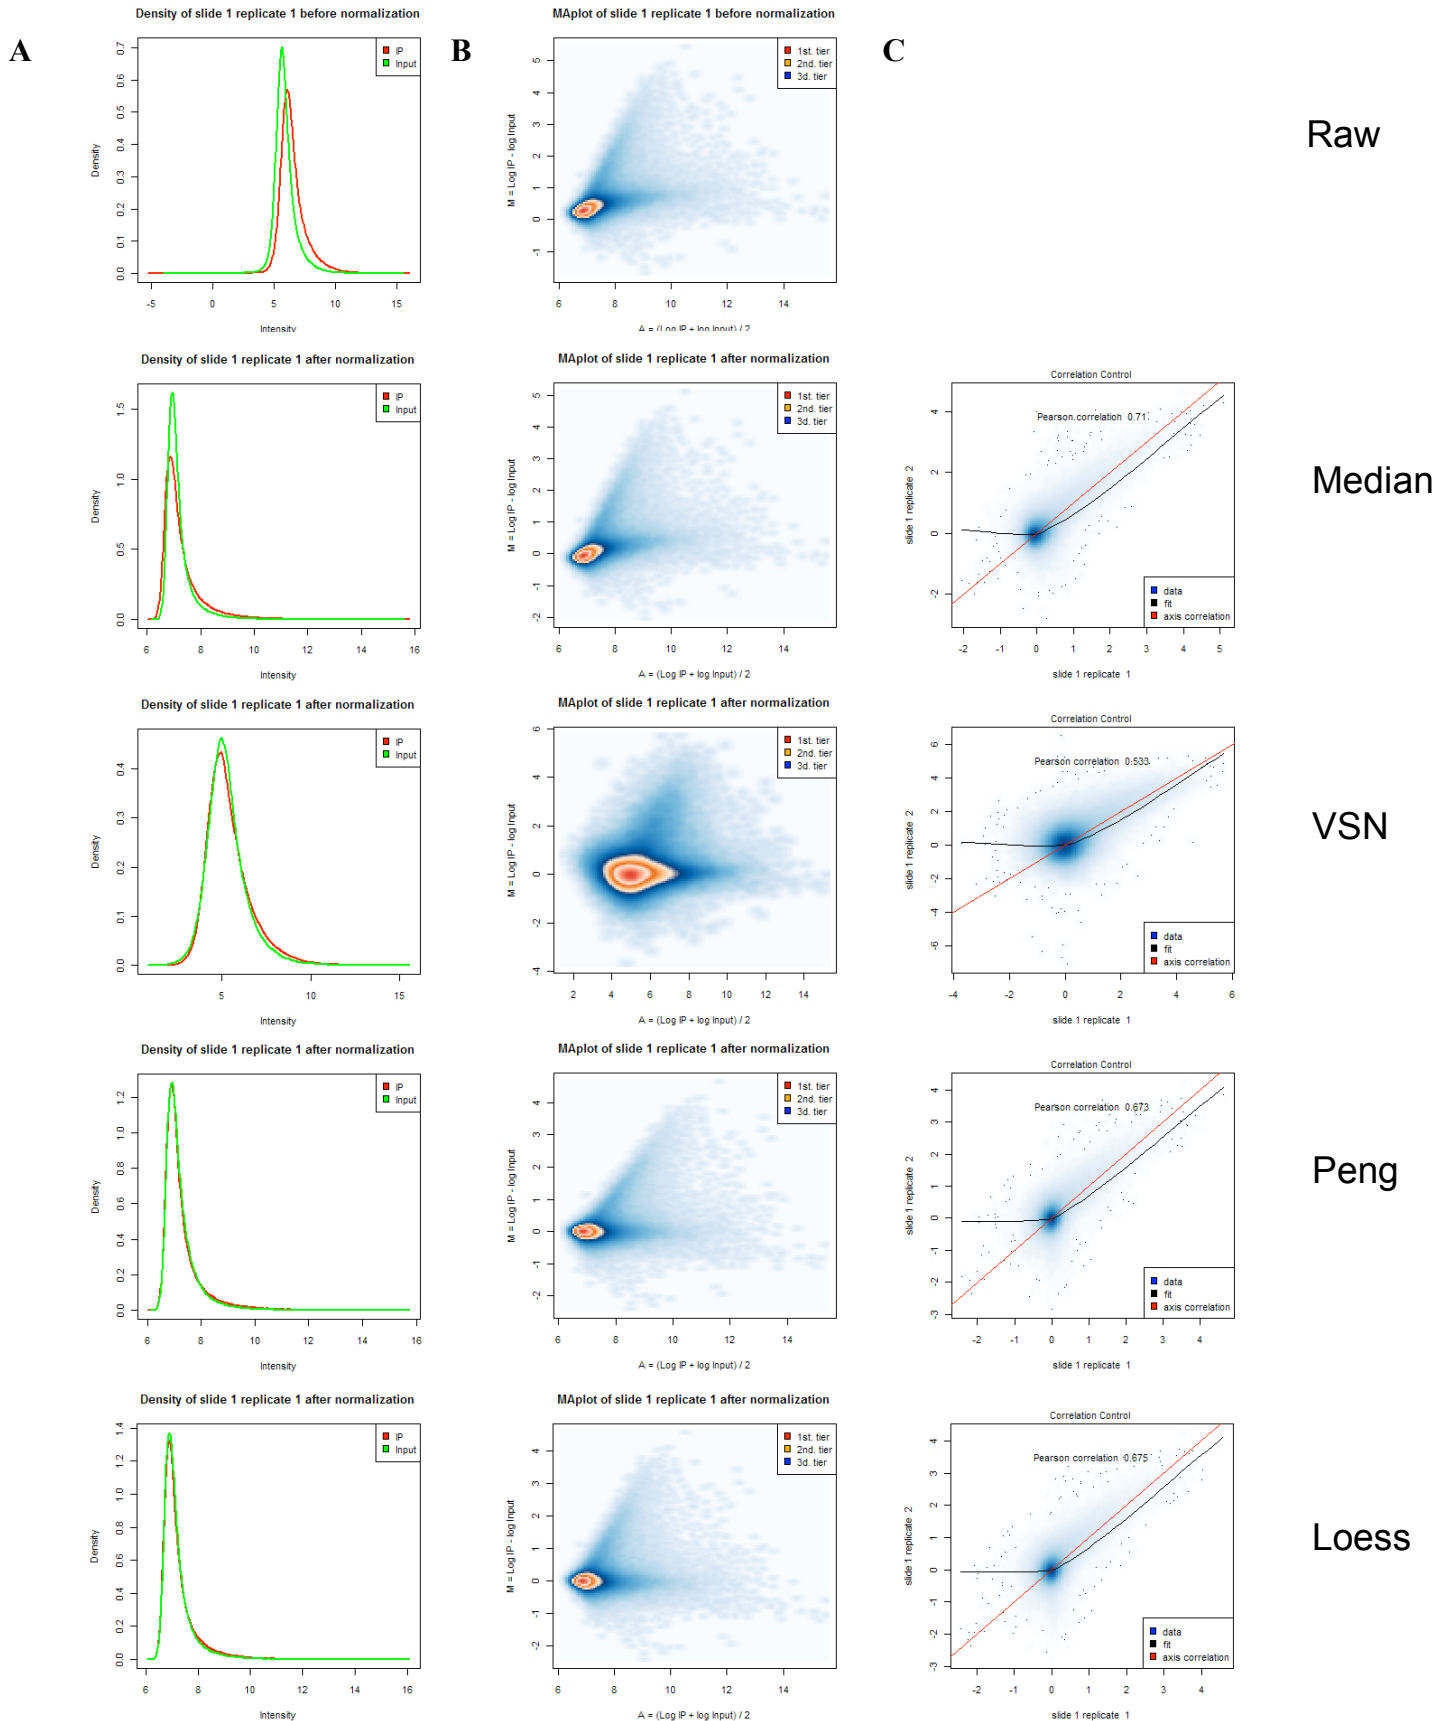

**Supplemental Fig. S2:** Sample quality control graphs generated from Suz12 ChIP-on-chip data, as described in the main text. The figure gives a per-row overview of the effects of each intra-normalisation method provided by the software. Column A\*: These graphs show separate density plots for green and red channels. Column B\*: MA plots corresponding to one array. These plots show a relative representation of the probes' intensities against the log ratio of green and red channels (X and Y axes respectively). Column C: Correlation graph between two replicates. All probes are plotted according to their log ratio, each axis corresponding to one replicate. A Pearson correlation coefficient is computed from the probes' enrichment after normalisation. This graph reflects the quality of the data and the effect of normalisation process on the data.

\* Only graphs for the first replicate of the first slide are shown.
