# Supplementary material for: CoCAS: a ChIP-on-chip analysis suite
Source: PubMed Central journal article supplement — Bioinformatics. 2009 Feb 4;25(7):954–5. doi: 10.1093/bioinformatics/btp075 (PMC2660873; doi:10.1093/bioinformatics/btp075), 2009-02-04
Supplement: btp075_4.pdf [file btp075_4.pdf]

## Sample Screenshot of CoCAS's main interface

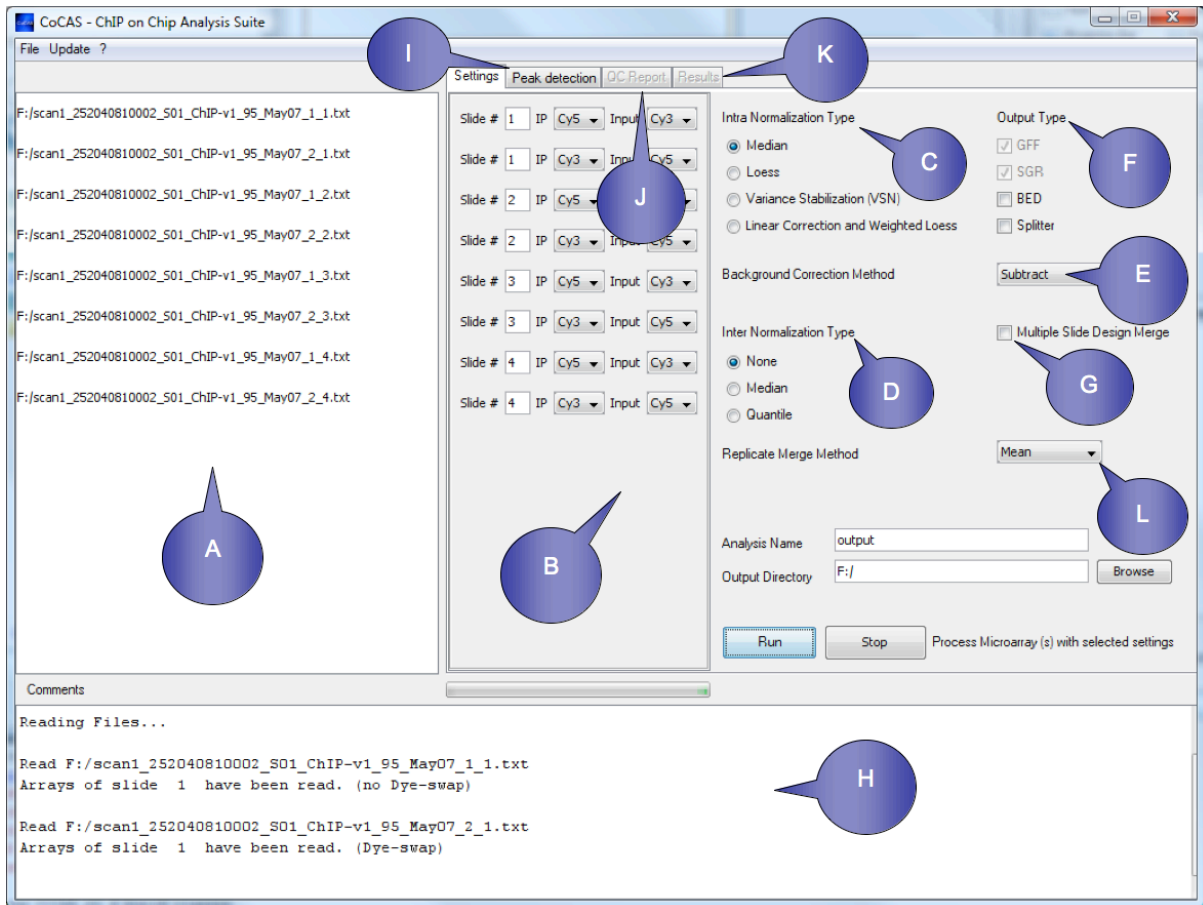

**Supplementary Fig. S3:** Example screenshot of CoCAS's main interface. (A) Loaded microarray file list, (B) slide numbering and dye selection, (C) and (D) intra- and inter-normalisation parameterisation, respectively. Other parameters include background subtraction (E), output file format (F), and use of multiple array designs (G). Progress can be viewed in an R output console (H). Peak detection parameters and standalone peak detection are available in a separate tab (I). QC report and peak detection results are displayed in tabs (J) and (K) respectively. (L) Replicate merging method.
