# Supplementary material for: CoCAS: a ChIP-on-chip analysis suite
Source: PubMed Central journal article supplement — Bioinformatics. 2009 Feb 4;25(7):954–5. doi: 10.1093/bioinformatics/btp075 (PMC2660873; doi:10.1093/bioinformatics/btp075), 2009-02-04
Supplement: btp075_5.pdf [file btp075_5.pdf]

## Connection to Genome Browsers (UCSC Genome Browser)

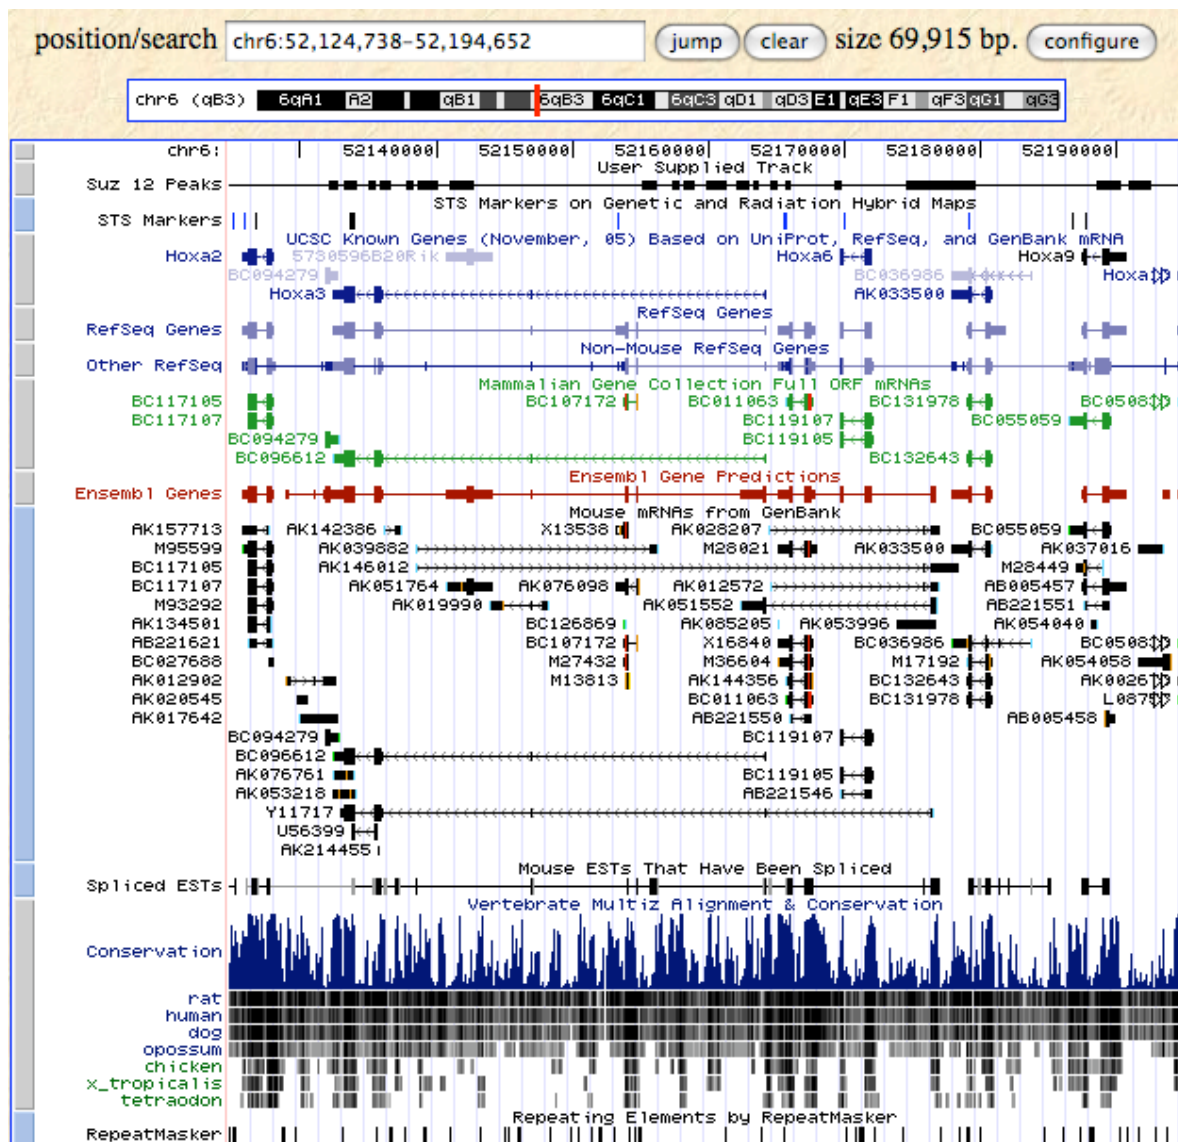

**Supplementary Fig. S4:** Results of CoCAS Suz12 peak detection on Hox11 cluster region were imported in UCSC genome Browser. The latter (as well as Ensembl) allows overlap with all available annotations, such as inter-species conservation data, CpG islands, genomic repeats, etc. for further analysis.
