# Supplementary material for: CoCAS: a ChIP-on-chip analysis suite
Source: PubMed Central journal article supplement — Bioinformatics. 2009 Feb 4;25(7):954–5. doi: 10.1093/bioinformatics/btp075 (PMC2660873; doi:10.1093/bioinformatics/btp075), 2009-02-04
Supplement: btp075_7.pdf [file btp075_7.pdf]

### ChIP-on-Chip Software Comparison

| Software                     | CoCAS                                                           | DNA Analytics <sup>(1)</sup>                  | TAS <sup>(2)</sup>                            | TiMAT <sup>(3)</sup>                          | MAT <sup>(4)</sup>                            |
|------------------------------|-----------------------------------------------------------------|-----------------------------------------------|-----------------------------------------------|-----------------------------------------------|-----------------------------------------------|
| Operating System             | Linux<br>MacOS<br>Windows                                       | Linux<br>MacOS<br>Windows                     | Windows                                       | Linux<br>MacOS                                | Linux<br>MacOS                                |
| Platform                     | Agilent                                                         | Agilent (using Agilent or GenePix scanner)    | Affymetrix                                    | Affymetrix<br>Nimblegen                       | Affymetrix                                    |
| Normalisation                | Median<br>Loess<br>Quantile<br>VSN<br>Linear Correction & Loess | Median<br>Loess<br>Quantile                   | Median<br>Quantile                            | CelProcessor                                  | Probe Standardisation<br>Quantile             |
| Dye Swap Handling            | Yes                                                             | Yes                                           | No                                            | No                                            | No                                            |
| Maximum Number of Slides     | No limit (depends on computer specifications)                   | No limit (depends on computer specifications) | No limit (depends on computer specifications) | No limit (depends on computer specifications) | No limit (depends on computer specifications) |
| Output Format                | BED<br>GFF<br>SGR<br>Splitter                                   | Proprietary                                   | BED                                           | GFF<br>SGR                                    | BAR<br>BED                                    |
| Graphical Interface Workflow | Yes                                                             | Yes                                           | Yes                                           | No                                            | No                                            |
| Licence                      | Academic                                                        | Commercial                                    | Academic                                      | Academic                                      | Academic                                      |

**Supplementary Table 1:** Computing and bioinformatical characteristics of CoCAS as compared with existing ChIP-on-chip analysis applications. Although primarily designed for the Agilent platform, CoCAS presents more flexible normalisation methods and output formats, as well as other functions provided by most programs; no limit on the number of slides in the case of multiple array designs. In terms of computing speed, CoCAS performs a standard 244K one-chip analysis with loess in 2 min 45 s on an average computer (2Ghz Pentium Core 2 Duo, 2Gb RAM). DNA analytics, its commercial and sole competitor, does perform the same analysis in 2 min 15 s on the same computer. However, CoCAS does spend extra processing time writing several output files that are readable in most genome browsers, whereas DNA Analytics does not. Moreover, in the case of microarray replicates, CoCAS spends longer working out correlation, as opposed to DNA Analytics, which does not.

#### References:

- <sup>(1)</sup> DNA Analytics : <http://www.chem.agilent.com/en-US/Products/Instruments/dnamicarrays/dnaanalyticssoftware/Pages/default.aspx>  
<sup>(2)</sup> TAS : [http://www.affymetrix.com/partners\\_programs/programs/developer/TilingArrayTools/index.affx](http://www.affymetrix.com/partners_programs/programs/developer/TilingArrayTools/index.affx)  
<sup>(3)</sup> TiMAT : <http://bdtnp.lbl.gov/TiMAT/>  
<sup>(4)</sup> MAT : <http://liulab.dfci.harvard.edu/MAT/>
